# Supplementary material
Source: PubMed Central journal article supplement (PMC6752724)
Supplement: NIHMS1536213-supplement-1.pdf [file NIHMS1536213-supplement-1.pdf]

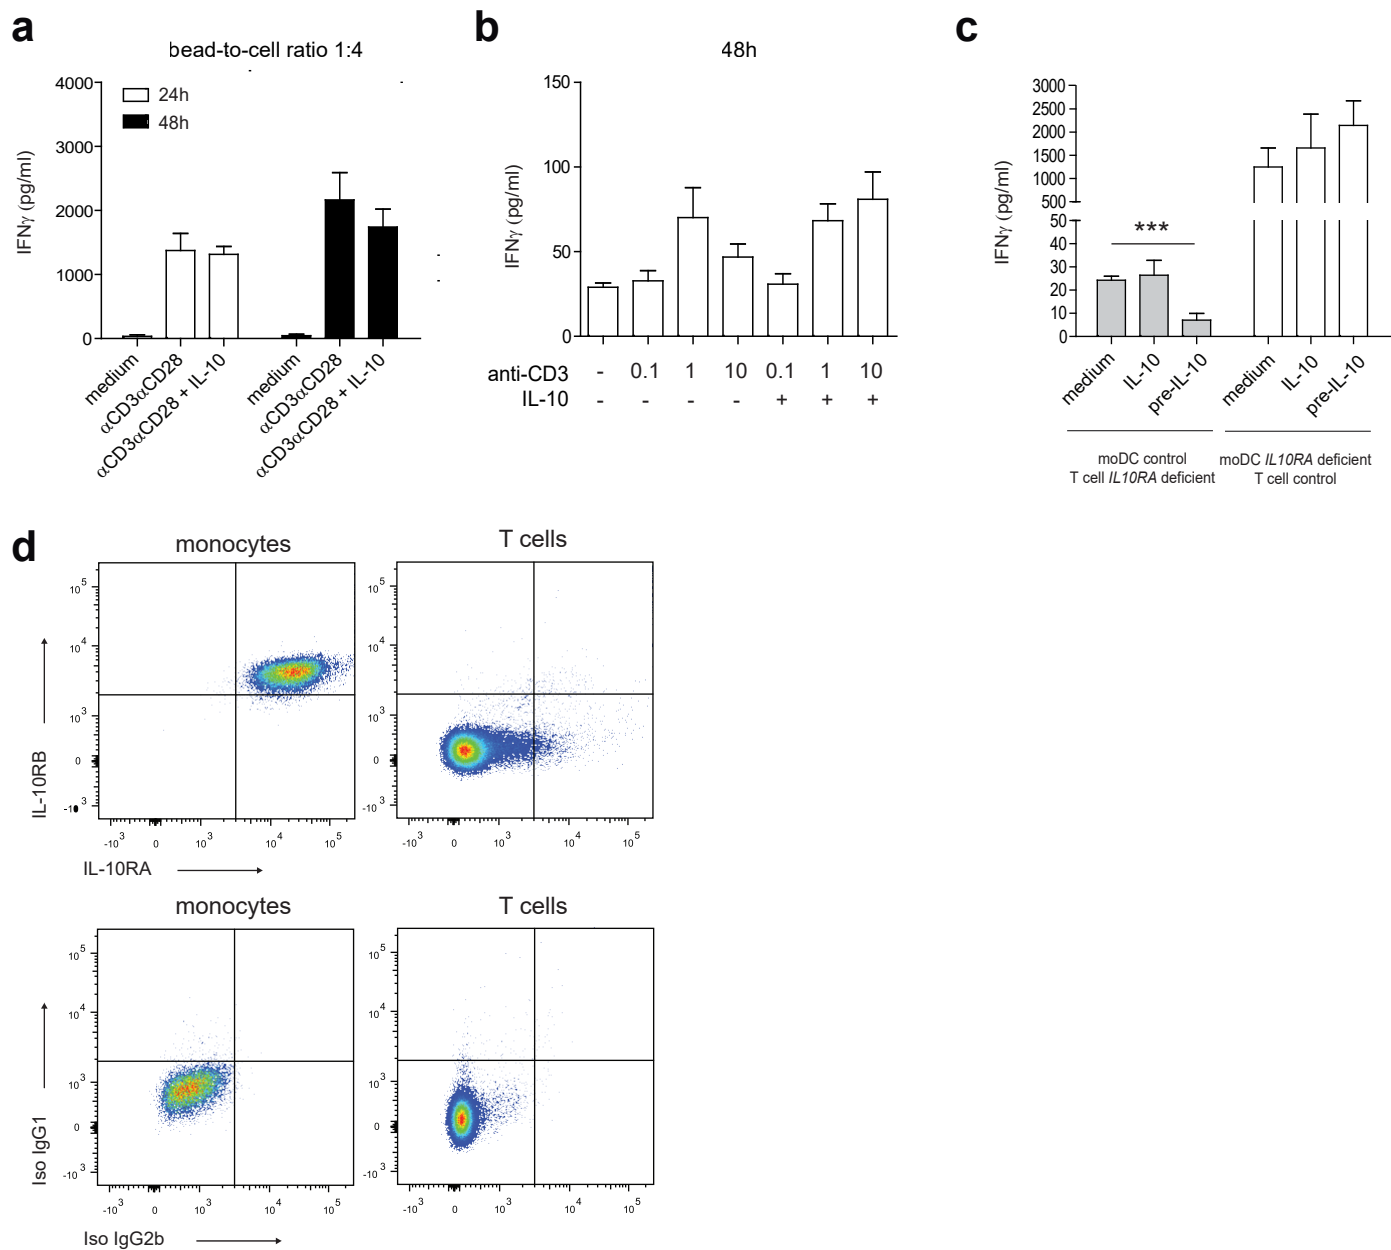

**Supplementary Figure S1.** IL-10 cannot inhibit IFN $\gamma$  secretion by CD4 $^+$  T cells in a direct manner.

(a, b) CD4 $^+$  T cells from adult healthy controls (n=4) were stimulated with (a) anti-CD3/CD28 beads (bead-to-cell ratio 1:4) or (b) plate-bound anti-CD3 antibody (0.1, 1, 10  $\mu$ g/ml) in the presence or absence of IL-10. After 24 h or 48 h, supernatants were assayed for IFN $\gamma$  using an ELISA. (c) Monocyte-derived DCs from an *IL10RA*-deficient patient or healthy controls were preincubated with LPS or LPS/IL-10 for 24 h. Allogeneic MLRs were performed by co-culturing moDCs and CD4 $^+$  T cells with or without IL-10. After 72 h, supernatants were assayed for IFN $\gamma$  using an ELISA. (d) Representative dotplots of data shown in Fig.1e. CD14 $^+$  monocytes and T cells were analyzed by flow cytometry for expression of IL-10RA and IL-10RB chains (gated on singlets).

Results are mean  $\pm$  SEM (a, b) or mean  $\pm$  SD (c) of a representative of at least 2 independent experiments. \*\*\*P<0.001 using unpaired Student's t test.

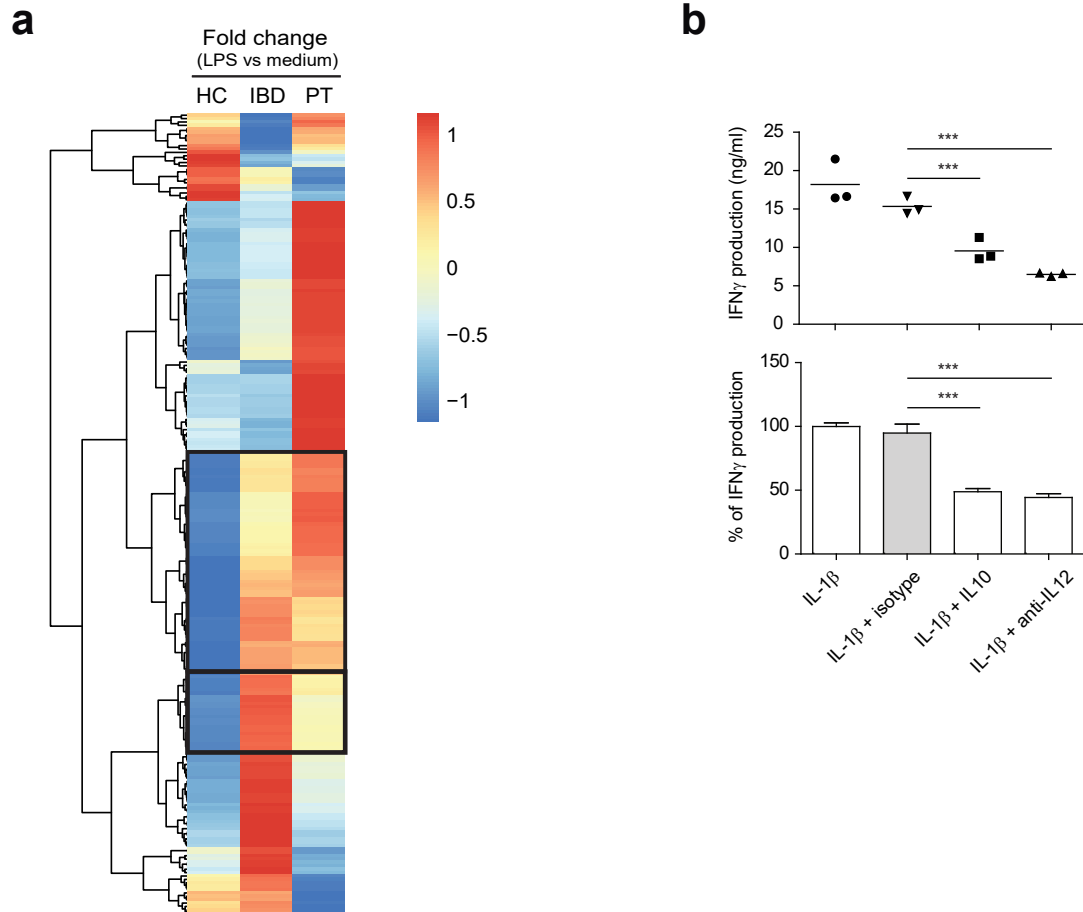

**Supplementary Figure S2.** (a) Gene expression profile of dendritic cells from pediatric IBD patients partially overlaps with *IL10RA*-deficient dendritic cells. Heat map of differentially expressed genes showing color-coded fold change between LPS stimulated and unstimulated moDCs from healthy controls (n=3), *IL10RA*-deficient patient, and pediatric IBD patients (n=3).

(b) IL-1 $\beta$  stimulates IFN $\gamma$  release by human CD4 $^+$  T cells indirectly through induction of IL-12 production (data related to Figure 3 of the manuscript). Allogeneic MLRs were performed using moDCs and CD4 $^+$  T cells from healthy individuals. SEB was added in the presence of IL-1 $\beta$ , with or without IL-10, neutralizing IL-12 antibodies, or isotype control. After 72 h, supernatants were assayed for IFN $\gamma$  using an ELISA. Top graph depicts 1 representative experiment of n=3. Bottom depicts combined data of n=3 experiments where IFN $\gamma$  production is expressed as percentage relative to the IL-1 $\beta$  condition (100%) in each experiment.

**a**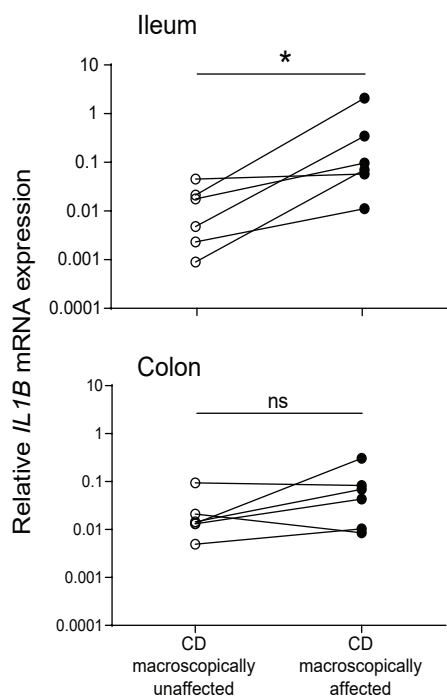**b**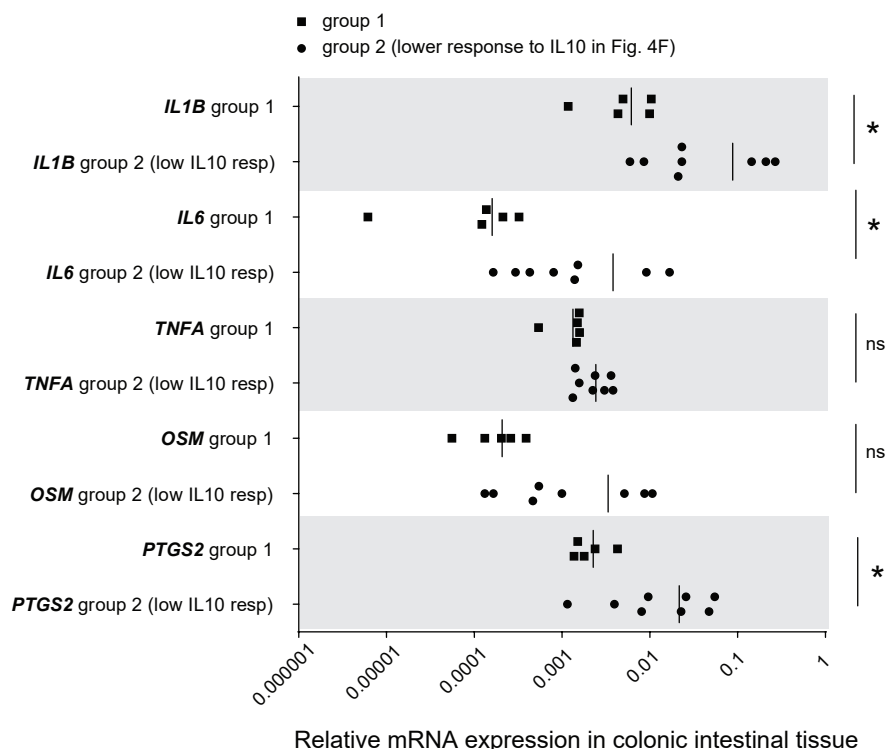**c**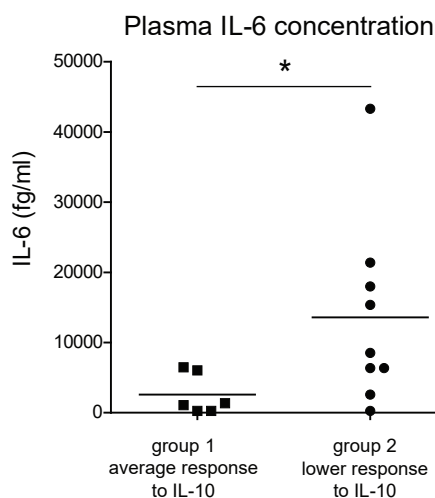**d**

| group 1: average IL-10 responder | age at diagnosis | diagnosis | Paris classification (Location);(behavior) | exposed to anti-TNF/biological 1=yes/0=no | exposed to other medication | resection |
|----------------------------------|------------------|-----------|--------------------------------------------|-------------------------------------------|-----------------------------|-----------|
| 1-female                         | 14               | CD        | L1+L4a; B1 + p                             | 1; IFX                                    | aza; 6-TG                   | 0         |
| 2-female                         | 16               | CD        | L2; B1                                     | 0                                         | aza                         | 0         |
| 3-female                         | 18               | CD        | L3; B1                                     | 0                                         | aza                         | 0         |
| 4-male                           | 15               | CD        | L1; B1                                     | 0                                         | aza; mesa                   | 0         |
| 5-female                         | 13               | UC        | E4; S0                                     | 0                                         | mesa                        | 0         |
| 6-male                           | 13               | UC        | E1; S0                                     | 0                                         | mesa; aza                   | 0         |
| group 2: low IL-10 responder     | age at diagnosis | diagnosis | Paris classification (Location);(behavior) | exposed to anti-TNF/biological 1=yes/0=no | exposed to other medication | resection |
| 1-male                           | 8                | CD        | L3+L4a; B1 + p                             | 1; IFX                                    | aza                         | 0         |
| 2-male                           | 12               | CD        | L3+L4a; B1 + p                             | 1; IFX; ADA                               | aza                         | 0         |
| 3-male                           | 10               | UC->CD    | L2; B1                                     | 1; IFX;                                   | aza                         | 0         |
| 4-female                         | 13               | CD        | L1+L4a; B1 + p                             | 0                                         | budesonide                  | 0         |
| 5-male                           | 9                | UC        | E4; S1                                     | 1; IFX; ADA                               | aza;mesa                    | 0         |
| 6-female                         | 12               | UC        | E2; S0                                     | 1; IFX; VEDO                              | mesa; aza                   | 0         |
| 7-male                           | 13               | IBDU      | E4;S0                                      | 1; IFX                                    |                             | 1         |
| 8-female                         | 9                | UC        | E4; S0                                     | 0                                         | mesa                        | 0         |
| 9-female                         | 13               | UC        | E4;S1                                      | 0                                         | mesa; aza                   | 0         |

UC, ulcerative colitis; CD, Crohn's disease; IFX, infliximab; ADA, adalimumab; VEDO, vedolizumab; aza, azathioprine; mesa, mesalazine; 6-TG, 6-thioguanine.

Paris Classification: *CD-Disease location*: (L1) involvement of the terminal ileum only, with limited or no cecal disease; (L2) colonic involvement only; (L3) involvement of both the terminal ileum and colon; (L4) isolated upper GI disease, defined as macroscopic and/or radiologic abnormalities proximal to the terminal ileum. Isolated upper GI disease (L4) is further separated into esophagogastrointestinal disease (L4a), jejunal/proximal ileal disease (L4b), or both L4a and L4b. Upper GI disease (i.e. L4a, L4b, L4ab) can also coexist with L1, L2, or L3.

*CD-Disease behavior*: is registered as the presence of strictures, intraabdominal fistulas, and/or intraabdominal abscesses and categorized disease according to the Paris classification: (B1) non-stricturing, non-penetrating disease; (B2) stricturing disease; (B3) penetrating disease (excluding isolated perianal or rectovaginal fistulas); (p) perianal disease. *UC-Disease location*: (E1) proctitis only; (E2) left-sided colitis, inflammation distal to the splenic flexure; (E3) extensive colitis, inflammation proximal to the splenic flexure but distal to the hepatic flexure; and (E4) pancolitis, defined as inflammation extending proximal to the hepatic flexure.

*UC-Disease behavior*: (S1) has experienced acute severe colitis; (S0) has not experienced acute severe colitis.

**Supplementary Figure S3.** Enhanced *IL1B* expression and suboptimal IL-10 function in pediatric IBD patients.

(a) *IL1B* mRNA expression was measured in biopsies from macroscopically affected intestine (closed symbol) and biopsies from unaffected regions (open symbol) derived from treatment-naive CD patients. Paired samples per individual patient are shown. (b) mRNA expression was measured in biopsies from group 1 and group 2 (lower response to IL-10) patients analyzed in Fig. 4f. (c) IL-6 concentrations in plasma of group 1 and group 2 (lower response to IL-10) patients analyzed in Fig. 4f. (d) Patient disease characteristics of group 1 and group 2 (lower response to IL-10) patients analyzed in Fig. 4f.

**Supplemental references referred to in Methods:**

51. Trapnell C, Pachter L, Salzberg SL. TopHat: discovering splice junctions with RNA-Seq. *Bioinformatics (Oxford, England)* 2009; **25**(9): 1105-1111.
52. Trapnell C, Williams BA, Pertea G, Mortazavi A, Kwan G, van Baren MJ *et al.* Transcript assembly and quantification by RNA-Seq reveals unannotated transcripts and isoform switching during cell differentiation. *Nature biotechnology* 2010; **28**(5): 511-515.

PT.LPS vs.PT.unstim

| tracking_id | Healthy Controls |          |            |         |            |          | Inflammatory bowel disease patients |          |             |          |             |          | IL10RA-deficient patient |             | logFC (PT LPS/PT unstim) | logCPM (counts per million) | PValue      | FDR         |
|-------------|------------------|----------|------------|---------|------------|----------|-------------------------------------|----------|-------------|----------|-------------|----------|--------------------------|-------------|--------------------------|-----------------------------|-------------|-------------|
|             | HC1 unstim       | HC1 LPS  | HC2 unstim | HC2 LPS | HC3 unstim | HC3 LPS  | IBD1 unstim                         | IBD1 LPS | IBD2 unstim | IBD2 LPS | IBD3 unstim | IBD3 LPS | PT unstim                | PT LPS      |                          |                             |             |             |
| CMFK2       | 81.982           | 170.55   | 3.91011    | 231.745 | 2.91992    | 220.241  | 5.64159                             | 241.614  | 5.79375     | 249.077  | 2.43557     | 241.427  | 1.73704                  | 292.617     | 7.33933061               | 6.4568128                   | 1.00474E-09 | 1.69315E-05 |
| IL1B        | 1.93472          | 139.946  | 2.52815    | 551.64  | 1.08036    | 905.961  | 0.583326                            | 535.264  | 0.208481    | 521.021  | 2.08817     | 1188.28  | 0.795252                 | 1245.66     | 10.5986027               | 10.54995098                 | 1.7774E-09  | 1.69315E-05 |
| IL8         | 1.47831          | 174.614  | 9.29087    | 923.455 | 3.77777    | 1400.42  | 2.09274                             | 552.801  | 2.30063     | 627.965  | 5.2537      | 561.494  | 7.59637                  | 2218.94     | 10.87455864              | 10.87455864                 | 3.83314E-09 | 2.2433E-05  |
| IL2RA       | 2.02511          | 21.3285  | 2.00383    | 85.7318 | 0.602627   | 37.1544  | 0.497805                            | 93.6372  | 0.310094    | 44.0758  | 0.305028    | 31.5818  | 0.0647704                | 68.1972     | 9.94161615               | 8.95259E-09                 | 3.31152E-05 | 3.31152E-05 |
| GCHI        | 1.06736          | 101.155  | 0.624818   | 107.441 | 1.58384    | 324.266  | 0.72337                             | 254.959  | 0.521104    | 140.148  | 1.97782     | 250.509  | 1.4361                   | 341.411     | 7.892843632              | 8.822916238                 | 9.40048E-09 | 3.5819E-05  |
| GBP5        | 4.31311          | 156.852  | 5.34422    | 241.239 | 4.12013    | 181.925  | 0.70541                             | 510.597  | 3.24626     | 309.74   | 3.1358      | 326.974  | 3.46742                  | 283.333     | 6.346923793              | 9.263179212                 | 1.36594E-08 | 4.3373E-05  |
| HERC5       | 2.459            | 132.591  | 1.46792    | 206.02  | 2.07946    | 255.035  | 3.15648                             | 310.101  | 2.30222     | 194.984  | 0.883408    | 187.578  | 1.22088                  | 204.096     | 7.612929321              | 8.809834134                 | 1.69063E-08 | 4.6014E-05  |
| IDO1        | 8.78675          | 417.533  | 2.61067    | 683.778 | 4.84584    | 727.883  | 2.79992                             | 1337.41  | 2.56386     | 508.59   | 3.13196     | 973.858  | 2.5964                   | 1360.92     | 9.028447746              | 6.26725E-05                 | 6.26725E-05 | 6.26725E-05 |
| CXCL10      | 0.933688         | 1128.07  | 1.24918    | 2666.28 | 0.721847   | 1942.87  | 1.29245                             | 3334.76  | 0.682744    | 1454.95  | 3.54997     | 3776.3   | 1.25077                  | 2719.47     | 11.07100718              | 10.59718287                 | 8.16024E-08 | 0.00172743  |
| CFB         | 1.68546          | 74.9856  | 1.86127    | 103.668 | 1.77782    | 140.199  | 2.41863                             | 280.854  | 5.34691     | 344.682  | 3.40021     | 213.657  | 1.93193                  | 128.173     | 6.046278238              | 7.466696491                 | 1.03526E-07 | 0.00197237  |
| DDX58       | 7.41079          | 716.037  | 6.76623    | 474.405 | 5.8043     | 500.557  | 8.17065                             | 641.447  | 7.42127     | 401.027  | 2.89581     | 314.894  | 9.75315                  | 575.472     | 5.880252492              | 10.54424841                 | 1.14962E-07 | 0.00199115  |
| MCOLN2      | 11.9283          | 72.8657  | 15.0701    | 175.784 | 14.3921    | 248.826  | 6.83454                             | 231.336  | 5.56241     | 156.747  | 8.59947     | 154.488  | 8.9296                   | 222.339     | 4.635592378              | 8.525316579                 | 1.49962E-07 | 0.000234464 |
| IFIT3       | 19.8136          | 1236.52  | 8.43754    | 1199.41 | 7.4065     | 1326.21  | 16.9743                             | 1781.87  | 34.7479     | 2116.53  | 7.75625     | 1599.57  | 11.8134                  | 1628.35     | 7.104927402              | 11.02122959                 | 1.60594E-07 | 0.000234464 |
| IL1B        | 15.9829          | 1367.71  | 36.3603    | 2575.98 | 21.8116    | 2868.16  | 9.11188                             | 2301.12  | 15.6688     | 3082.94  | 5.45178     | 9642.2   | 14.3804                  | 7633.21     | 9.050455838              | 12.44138693                 | 1.72251E-07 | 0.000234464 |
| IFI4L4      | 2.0609           | 75.9017  | 0.76707    | 153.714 | 0.429261   | 186.201  | 2.45213                             | 188.886  | 1.60398     | 136.524  | 0.169206    | 83.474   | 0.499117                 | 183.549     | 8.51352221               | 9.192044285                 | 2.40323E-07 | 0.000273167 |
| PDE4B       | 1.14035          | 14.0707  | 1.7322     | 40.1181 | 1.101      | 34.6159  | 0.790558                            | 53.7205  | 1.94624     | 36.3354  | 1.30986     | 63.2904  | 2.1449                   | 31.111      | 5.928073437              | 4.25187E-07                 | 0.000273167 | 0.000273167 |
| DDX80       | 3.11665          | 47.072   | 2.6048     | 73.7511 | 3.4851     | 72.6714  | 4.28868                             | 113.708  | 1.61875     | 57.2071  | 1.47104     | 50.803   | 1.75422                  | 68.7645     | 5.288729873              | 7.857818075                 | 2.497E-07   | 0.000273167 |
| EREG        | 0.675609         | 18.2128  | 1.00504    | 28.7771 | 0.714368   | 46.1869  | 1.00395                             | 35.4144  | 0.541499    | 23.3     | 1.03693     | 0.860157 | 63.7557                  | 7.452386106 | 6.334469218              | 7.452386106                 | 2.58083E-07 | 0.000273167 |
| DAS3        | 8.55228          | 167.954  | 5.69021    | 236.709 | 6.98077    | 185.543  | 9.98077                             | 268.584  | 9.03897     | 231.594  | 11.4558     | 261.721  | 4.27714                  | 197.523     | 5.526311549              | 9.504694648                 | 2.8931E-07  | 0.000277744 |
| PARP1       | 45.3236          | 411.363  | 39.4066    | 568.469 | 52.2405    | 720.549  | 42.6087                             | 792.853  | 30.3352     | 563.173  | 22.8825     | 508.789  | 33.5102                  | 764.927     | 4.510291045              | 11.71325463                 | 3.14386E-07 | 0.000277744 |
| RARL1       | 0.115158         | 66.0161  | 1.52818    | 151.97  | 0.331247   | 153.312  | 0.331247                            | 79.3266  | 1.44533     | 208.596  | 0.136684    | 88.9808  | 0.572664                 | 88.8519     | 7.186852164              | 4.102105099                 | 3.199E-07   | 0.000277744 |
| IL15RA      | 1.60472          | 88.575   | 1.86616    | 97.2408 | 0.901437   | 69.3594  | 0.643528                            | 134.133  | 0.732031    | 140.576  | 3.30913     | 286.664  | 0.472716                 | 188.298     | 8.63885914               | 7.287789434                 | 3.21099E-07 | 0.000277744 |
| CCL20       | 0.179329         | 41.4614  | 0.30599    | 160.445 | 1.65235    | 458.782  | 0.131773                            | 164.391  | 0.127808    | 147.735  | 0.848409    | 343.977  | 0.99507                  | 537.586     | 7.594977585              | 7.594977585                 | 3.39571E-07 | 0.000277744 |
| ELOVL7      | 1.23782          | 12.7537  | 0.752417   | 17.4175 | 0.5289     | 34.5079  | 0.834508                            | 31.7419  | 0.895871    | 21.9939  | 1.6631      | 33.3113  | 0.941681                 | 40.7774     | 5.433057659              | 6.410556577                 | 3.98977E-07 | 0.000277744 |
| HERC6       | 2.66324          | 46.5265  | 2.15795    | 78.029  | 2.92419    | 83.7858  | 3.34351                             | 96.156   | 2.82091     | 83.3675  | 1.84529     | 57.7233  | 2.85088                  | 90.3456     | 4.984264449              | 7.575341715                 | 1.49962E-07 | 0.000277744 |
| IFIT2       | 11.4341          | 815.788  | 3.82584    | 782.753 | 1.79597    | 917.48   | 9.60049                             | 1141.25  | 8.26707     | 926.108  | 2.00618     | 817.981  | 3.49775                  | 946.19      | 8.076047012              | 10.77545332                 | 4.85752E-07 | 0.00036159  |
| GBP4        | 1.94152          | 85.7592  | 1.13638    | 127.678 | 0.984902   | 86.7133  | 0.9856                              | 197.12   | 0.43737     | 91.4466  | 1.06919     | 139.694  | 0.73918                  | 95.9952     | 7.014293668              | 8.331384042                 | 4.77042E-07 | 0.00036159  |
| USP18       | 1.78187          | 112.536  | 0.973316   | 132.708 | 0.652027   | 129.67   | 1.42496                             | 166.996  | 1.81715     | 193.234  | 0.239739    | 175.675  | 1.22324                  | 184.359     | 7.225879736              | 7.577363015                 | 5.3036E-07  | 0.000349173 |
| CXCL1       | 0.0391699        | 18.4554  | 0.201502   | 141.925 | 0.540937   | 480.91   | 0.0288148                           | 111.117  | 0.421178    | 286.745  | 0.75662     | 160.879  | 0.108196                 | 10.3689502  | 9.113118413              | 5.31494E-07                 | 0.000349173 | 0.000349173 |
| RSAD2       | 25.4073          | 1071.31  | 13.9299    | 1587.34 | 10.9554    | 1874.77  | 11.6158                             | 1663.95  | 21.1752     | 1812.66  | 4.54674     | 1099.71  | 14.9955                  | 2115.13     | 7.137862706              | 11.948303024                | 5.96638E-07 | 0.000378905 |
| OAS2        | 27.3949          | 548.81   | 16.0245    | 582.204 | 13.0076    | 372.482  | 3.4615                              | 792.5    | 26.5642     | 638.148  | 13.3137     | 619.063  | 12.3442                  | 10.61828    | 5.769809987              | 10.12591553                 | 0.000530678 | 0.000530678 |
| CYP7B1      | 0.256674         | 2.99174  | 0.0888434  | 14.7991 | 0.16588    | 12.8135  | 0.0887486                           | 27.2972  | 0           | 5.31118  | 0.080078    | 15.4336  | 0                        | 12.3627     | 10.96450912              | 3.926158073                 | 1.16877E-06 | 0.000695854 |
| MX2         | 7.21066          | 242.66   | 4.29574    | 265.482 | 2.69066    | 181.664  | 12.3587                             | 376.606  | 9.72176     | 345.109  | 7.38359     | 376.93   | 2.42336                  | 249.489     | 6.8812728                | 6.805897324                 | 1.78763E-06 | 0.001026926 |
| XAF1        | 17.9324          | 164.33   | 16.9228    | 235.479 | 16.8344    | 367.302  | 26.9311                             | 312.958  | 31.2917     | 289.965  | 7.91662     | 208.329  | 16.109                   | 375.288     | 4.570266136              | 9.52729265                  | 1.83264E-06 | 0.001026926 |
| CBP1        | 10.7061          | 358.933  | 10.117     | 483.139 | 16.5487    | 505.93   | 108.413                             | 1030.34  | 1082.41     | 7.93361  | 382.391     | 13.287   | 780.278                  | 959.551     | 5.392125723              | 5.392125723                 | 2.31029E-06 | 0.001257589 |
| IFIH1       | 25.649           | 422.74   | 27.96      | 585.984 | 37.6604    | 899.928  | 28.466                              | 757.118  | 21.0448     | 543.537  | 22.849      | 559.676  | 57.6679                  | 1258.23     | 4.445444726              | 11.29129818                 | 2.44493E-06 | 0.00128426  |
| SOD2        | 38.6141          | 1617.84  | 72.51      | 3248.93 | 45.2183    | 2230.54  | 58.1319                             | 3267.71  | 54.8371     | 2754.39  | 211.108     | 3040.18  | 83.3227                  | 2675.37     | 5.031152438              | 10.76030345                 | 2.52159E-06 | 0.00128426  |
| VEP1        | 0.0153544        | 0.612639 | 0.018718   | 1.31588 | 0.0383576  | 0.379083 | 0.0297081                           | 1.08711  | 0.113695    | 0.708994 | 0.0340226   | 0.339854 | 0                        | 0.955757    | 9.73986723               | 2.700577102                 | 5.19511E-06 | 0.00128426  |
| IFI4        | 13.0212          | 137.865  | 6.58444    | 316.729 | 9.80888    | 506.729  | 13.0768                             | 326.332  | 7.50058     | 260.632  | 2.72034     | 232.781  | 10.5973                  | 484.859     | 5.402456617              | 8.617752339                 | 2.94347E-06 | 0.00137921  |
| PARP9       | 16.0622          | 132.255  | 12.6896    | 173.792 | 17.5716    | 256.579  | 16.3398                             | 225.615  | 13.8411     | 171.904  | 4.88264     | 148.65   | 17.7061                  | 257.887     | 7.700693789              | 9.043786242                 | 3.37001E-06 | 0.00137921  |
| PLSCR1      | 2.3564           | 22.9885  | 1.00265    | 50.6654 | 1.86428    | 84.345   | 2.74222                             | 70.5523  | 0.971906    | 53.2043  | 1.13802     | 55.3229  | 1.94415                  | 59.1421     | 4.920844871              | 6.104059686                 | 5.44995E-06 | 0.002532497 |
| PTGS2       | 0.331051         | 33.4102  | 1.08206    | 128.75  | 0.604018   | 208.147  | 0.504792                            | 118.037  | 0.12307     | 113.97   | 1.22155     | 368.772  | 1.96779                  | 84.1261     | 8.740412441              | 10.99045567                 | 6.69438E-06 | 0.002532497 |
| NFKB1       | 41.8609          | 238.411  | 50.1332    | 335.146 | 40.3206    | 312.434  | 27.893                              | 432.577  | 31.5264     | 326.146  | 50.7973     | 428.626  | 48.3476                  | 528.765     | 5.449157654              | 10.2941414                  | 6.4272E-06  | 0.002724517 |
| DENN5A      | 12.1335          | 101.699  | 11.7905    | 103.958 | 13.3049    | 122.392  | 13.2442                             | 187.724  | 7.96193     | 114.339  | 23.291      | 236.157  | 12.548                   | 166.686     | 3.22851059               | 8.902046971                 | 6.47429E-06 | 0.002724517 |
| MX1         | 19.5717          | 743.35   | 13.0624    | 763.214 | 5.10095    | 548.274  | 32.7324                             | 1025.72  | 27.8244     | 981.816  | 7.40385     | 797.968  | 10.4121                  | 748.068     | 6.177705021              | 10.07942692                 | 6.56471E-06 | 0.002724517 |
| TRIM22      | 10.1125          | 70.3008  | 11.3631    | 118.247 |            |          |                                     |          |             |          |             |          |                          |             |                          |                             |             |             |

## PT.LPS.vs.PT.unstim

|           |           |          |           |          |           |          |           |          |           |          |           |          |           |          |              |             |             |             |
|-----------|-----------|----------|-----------|----------|-----------|----------|-----------|----------|-----------|----------|-----------|----------|-----------|----------|--------------|-------------|-------------|-------------|
| UBE2L6    | 33.6059   | 275.257  | 30.3464   | 246.187  | 42.4375   | 246.226  | 35.2496   | 287.899  | 39.5067   | 419.165  | 42.1091   | 256.275  | 31.7841   | 305.846  | 3.26637065   | 7.649680867 | 3.01353E-05 | 0.007176722 |
| NEURL3    | 0.511471  | 25.7904  | 0.683452  | 45.2833  | 0.495176  | 47.0774  | 0.0755936 | 42.3528  | 0.662499  | 118.287  | 0.299574  | 32.0688  | 0.430611  | 53.9957  | 6.93925364   | 5.491174567 | 3.18513E-05 | 0.007315292 |
| NUS1      | 6.56626   | 348.984  | 54.7166   | 410.268  | 33.2516   | 265.326  | 35.8635   | 473.079  | 28.409    | 384.939  | 31.7423   | 316.323  | 28.5677   | 282.179  | 3.45749398   | 5.042163929 | 3.1962E-05  | 0.007315292 |
| MARPK8    | 4.02680   | 17.0705  | 3.93225   | 25.0346  | 4.32118   | 46.7369  | 3.65224   | 38.7767  | 2.06738   | 1.5298   | 4.41152   | 67.9522  | 3.84857   | 56.2018  | 3.862097595  | 6.524296786 | 3.21085E-05 | 0.007315292 |
| SLAMP1    | 1.02386   | 19.3963  | 2.31051   | 69.1317  | 2.80523   | 98.5511  | 0.463904  | 55.1629  | 1.4693    | 163.999  | 1.44312   | 41.1681  | 1.3562    | 87.3773  | 6.000617959  | 5.484327198 | 3.2253E-05  | 0.007315292 |
| TRIM25    | 12.0094   | 97.9525  | 12.8833   | 110.504  | 15.4053   | 97.3677  | 13.32     | 118.444  | 15.0018   | 140.163  | 14.5559   | 135.549  | 12.7706   | 128.517  | 3.328649047  | 8.777350399 | 3.292E-05   | 0.007315292 |
| LOC731424 | 2.95904   | 68.3344  | 2.20001   | 60.3014  | 7.48642   | 156.281  | 0.784315  | 80.4009  | 3.50507   | 210.44   | 4.91415   | 146.099  | 4.43961   | 147.354  | 5.04957699   | 8.083447373 | 3.39502E-05 | 0.00749211  |
| TRDR7     | 14.9253   | 83.4482  | 13.9014   | 92.2454  | 18.1716   | 116.928  | 12.5785   | 117.014  | 8.15544   | 81.2553  | 6.7151    | 83.2499  | 12.4414   | 115.935  | 3.217825444  | 8.001756563 | 3.4232E-05  | 0.00749211  |
| TNFAIP6   | 1.08152   | 179.489  | 2.32117   | 372.351  | 3.11728   | 1233.23  | 2.53052   | 1537.4   | 0.499604  | 406.533  | 14.1646   | 1458.35  | 6.22805   | 1612.59  | 8.013423905  | 10.11668205 | 3.46056E-05 | 0.00749211  |
| IRF7      | 2.10088   | 36.1961  | 1.02149   | 27.827   | 0.804086  | 29.673   | 2.29487   | 30.8213  | 4.374     | 70.4026  | 2.55384   | 58.1796  | 1.42064   | 36.4738  | 4.673385739  | 5.160850089 | 3.6865E-05  | 0.007891601 |
| KCNQ3     | 0.035528  | 0.044094 | 0.0494879 | 0.273907 | 0.0640964 | 0.231918 | 0.058157  | 0.24519  | 0.0850986 | 0.190267 | 0.0746679 | 0.247949 | 0.0279003 | 1.52006  | 5.701173427  | 3.186226215 | 3.87128E-05 | 0.008195078 |
| STAT1     | 42.4661   | 323.136  | 27.5325   | 318.2    | 51.5636   | 345.03   | 41.1623   | 427.067  | 30.1108   | 308.469  | 27.5222   | 278.017  | 33.203    | 230.232  | 3.188084149  | 9.430661182 | 3.9311E-05  | 0.008230265 |
| ADORA2A   | 0.158648  | 4.17911  | 0.508231  | 14.9245  | 0.0219748 | 5.20777  | 0.14111   | 20.0346  | 0.0515838 | 18.6572  | 0.278361  | 28.9604  | 0         | 11.7504  | 10.99941102  | 3.961072216 | 4.05205E-05 | 0.008391275 |
| PNPT1     | 4.46643   | 27.6765  | 4.18386   | 53.0907  | 6.12252   | 88.8312  | 4.04137   | 59.6606  | 2.80279   | 49.3568  | 2.20526   | 38.8031  | 0.05144   | 68.1896  | 3.751938212  | 7.489109257 | 4.80646E-05 | 0.008465616 |
| CD80      | 26.9651   | 145.991  | 30.1584   | 291.573  | 21.5036   | 235.288  | 22.9096   | 439.533  | 12.1852   | 208.459  | 5.04439   | 193.152  | 23.4174   | 333.586  | 8.30517439   | 8.998290865 | 4.88729E-05 | 0.00905592  |
| IL1A      | 2.96888   | 39.1826  | 4.58958   | 144.276  | 5.84667   | 402.657  | 1.42723   | 150.072  | 0.745423  | 97.4968  | 3.8574    | 532.745  | 5.12021   | 806.106  | 7.29585077   | 10.27573197 | 5.15283E-05 | 0.010245092 |
| BRIP1     | 1.42903   | 15.9447  | 1.30052   | 23.8855  | 1.42372   | 24.3759  | 1.46715   | 34.5567  | 0.662865  | 11.1044  | 1.03957   | 16.0436  | 0.931623  | 20.542   | 4.457869448  | 6.58214188  | 5.16234E-05 | 0.010245092 |
| UDSP5     | 9.28854   | 119.725  | 10.8891   | 151.122  | 14.4735   | 165.424  | 5.85635   | 141.933  | 15.0817   | 211.163  | 8.43202   | 139.042  | 12.5674   | 21.242   | 4.068984948  | 8.189142259 | 5.63597E-05 | 0.01106274  |
| RNF213    | 44.7205   | 387.826  | 34.0103   | 330.728  | 37.8932   | 241.644  | 32.8556   | 472.566  | 27.8598   | 307.497  | 40.8476   | 420.501  | 28.8614   | 336.076  | 3.53441564   | 12.00531629 | 5.69047E-05 | 0.01106274  |
| ARHGAP18  | 68.2143   | 14.2775  | 94.8505   | 13.3843  | 74.0161   | 14.6409  | 76.0028   | 9.88732  | 43.9471   | 9.40395  | 36.8049   | 7.67561  | 62.75     | 7.1454   | -3.159611547 | 7.014841492 | 6.89339E-05 | 0.011341498 |
| CD40      | 29.3855   | 367.548  | 64.1272   | 626.417  | 42.8198   | 495.326  | 25.2317   | 579.997  | 82.5727   | 91.4748  | 39.0428   | 110.375  | 50.2701   | 548.283  | 8.85450739   | 8.85450739  | 6.1708E-05  | 0.011756603 |
| CHS1      | 8.8959    | 12.6886  | 0.348627  | 9.44366  | 2.1879    | 23.6374  | 0.625984  | 10.645   | 0.552391  | 16.5179  | 1.08521   | 10.3114  | 0.0786133 | 6.25023  | 6.267521377  | 4.309588684 | 6.34656E-05 | 0.011917433 |
| TKB       | 4.62811   | 29.0836  | 3.18042   | 41.8759  | 2.5337    | 35.9395  | 2.66132   | 43.8668  | 2.91627   | 75.7198  | 8.73651   | 94.5299  | 2.01985   | 62.8245  | 4.951093773  | 5.514391433 | 6.51786E-05 | 0.012177442 |
| PLAT      | 0.224779  | 11.6373  | 0.251377  | 24.7834  | 0.0549633 | 14.9511  | 0.176553  | 28.6672  | 0.0143407 | 13.5674  | 0.0618383 | 41.9174  | 0.206718  | 21.74    | 6.729803023  | 5.174600418 | 6.80284E-05 | 0.012583272 |
| TAF1      | 14.9048   | 137.148  | 18.1956   | 153.453  | 9.2878    | 75.1192  | 13.3391   | 159.59   | 13.2708   | 166.981  | 20.3599   | 153.238  | 9.60905   | 107.637  | 6.943529298  | 7.497834539 | 6.93325E-05 | 0.01270118  |
| MGC39372  | 1.44184   | 37.6672  | 1.23727   | 27.6202  | 0.497735  | 18.9448  | 0.21241   | 11.1443  | 0         | 7.88426  | 0.211456  | 17.5282  | 0         | 9.93545  | 9.589720395  | 2.550235906 | 7.09045E-05 | 0.01286545  |
| GK        | 4.92263   | 16.4789  | 4.66646   | 24.6911  | 6.64996   | 30.9976  | 3.94943   | 26.5572  | 3.29964   | 21.4918  | 4.29751   | 26.643   | 5.34084   | 36.6627  | 9.589720395  | 6.754735968 | 7.36452E-05 | 0.013236691 |
| APOBEC3G  | 4.56503   | 53.0791  | 4.81541   | 55.9795  | 3.60468   | 39.124   | 4.94481   | 59.9152  | 1.62027   | 30.0772  | 7.64037   | 74.9045  | 2.21247   | 35.6407  | 3.999703019  | 5.111616241 | 7.50219E-05 | 0.013249671 |
| IFITM3    | 8.0589    | 374.422  | 11.2987   | 348.787  | 17.4088   | 119.425  | 4.57908   | 239.536  | 7.36817   | 513.147  | 1.57722   | 279.6    | 1.35951   | 238.642  | 7.427579484  | 5.976285546 | 7.50184E-05 | 0.013249671 |
| APOL6     | 5.85916   | 37.3337  | 4.43382   | 60.5983  | 8.53713   | 66.588   | 4.89823   | 71.4309  | 4.0331    | 68.5802  | 2.30085   | 50.3072  | 6.78873   | 70.9913  | 3.383788895  | 8.758299709 | 7.71156E-05 | 0.013478966 |
| CNNA1     | 13.7065   | 85.0074  | 8.58858   | 106.044  | 16.2623   | 162.491  | 6.99801   | 133.647  | 11.4832   | 125.916  | 9.58503   | 156.191  | 12.7119   | 215.029  | 7.71623949   | 9.35071E-05 | 0.01440728  | 0.01440728  |
| EIF2AK2   | 13.7662   | 92.982   | 9.10247   | 151.058  | 8.45919   | 137.008  | 14.353    | 160.848  | 9.94938   | 126.357  | 5.03602   | 84.3737  | 6.56487   | 103.425  | 3.968301835  | 7.01452578  | 8.4134E-05  | 0.01440728  |
| TNIP3     | 0.254806  | 20.467   | 0.394598  | 47.9728  | 1.05658   | 458.085  | 0.414408  | 191.708  | 1.28529   | 443.675  | 1.60604   | 21.9151  | 1.52087   | 163.922  | 7.64471458   | 7.681821244 | 8.92183E-05 | 0.015176675 |
| C15orf26  | 0.0823786 | 0.61866  | 0.0705991 | 1.72328  | 0.0379672 | 3.85001  | 0         | 0.911532 | 0         | 1.95871  | 0.0643515 | 1.38326  | 0.035351  | 5.14168  | 6.825196266  | 1.995942154 | 9.16519E-05 | 0.015340091 |
| SHB       | 2.37448   | 0.662938 | 2.41047   | 0.429512 | 3.0356    | 0.442268 | 1.70315   | 0.214146 | 4.13193   | 0.651049 | 3.47071   | 0.261796 | 3.09521   | 0.166152 | -4.202599735 | 3.412507964 | 9.17893E-05 | 0.015340091 |
| OASL      | 1.38621   | 128.692  | 0.862304  | 152.263  | 0.276225  | 27.4361  | 1.6261    | 174.558  | 1.96105   | 122.228  | 1.97879   | 214.817  | 0.233231  | 69.7624  | 8.147470984  | 6.175785602 | 9.61038E-05 | 0.015830968 |
| OCI3L3    | 0.134185  | 68.4197  | 1.07915   | 52.9535  | 0.737636  | 14.7124  | 0.244757  | 39.377   | 1.20787   | 1.20787  | 0.632973  | 6.17067  | 0         | 146.86   | 5.62855512   | 9.69875E-05 | 0.015830968 |             |
| RARRR51   | 0.943394  | 3.32457  | 0.287886  | 3.81696  | 0.574915  | 11.4093  | 1.69946   | 28.8943  | 2.18125   | 17.0318  | 0.60907   | 17.8808  | 1.30516   | 41.6313  | 4.982096408  | 5.030351994 | 9.72194E-05 | 0.015830968 |
| FAM94     | 2.25915   | 25.9586  | 2.72021   | 61.0615  | 2.69519   | 32.3046  | 2.15359   | 61.1298  | 1.79636   | 27.4021  | 2.93073   | 36.827   | 4.37108   | 48.765   | 3.47838479   | 7.066136994 | 9.88893E-05 | 0.01596443  |
| SERPINB1  | 15.6586   | 66.6081  | 14.2957   | 97.4586  | 16.2577   | 98.078   | 19.8991   | 189.515  | 10.8554   | 99.7388  | 16.8764   | 126.885  | 14.7918   | 117.531  | 2.98843344   | 7.512847936 | 0.000108085 | 0.01619804  |
| GBP1P1    | 0.0366852 | 0.84243  | 0         | 10.7001  | 0.0506512 | 5.66125  | 0.108067  | 27.9453  | 0.394587  | 7.62094  | 0         | 25.7378  | 0         | 14.0231  | 10.106145648 | 3.02248187  | 0.000119223 | 0.01893398  |
| MT2A      | 24.9978   | 848.452  | 12.2389   | 766.504  | 28.7932   | 504.455  | 28.7045   | 870.776  | 50.4758   | 1359.28  | 107.307   | 1561.81  | 21.8994   | 749.641  | 5.06953921   | 6.573613575 | 0.000122525 | 0.019252354 |
| KIAA0040  | 8.84903   | 75.9637  | 13.8365   | 93.6265  | 12.2846   | 68.8909  | 9.60917   | 105.186  | 16.9728   | 169.449  | 6.58926   | 111.271  | 8.37221   | 97.4732  | 3.548250339  | 8.0139995   | 0.000129741 | 0.020260639 |
| IRAK2     | 0.721779  | 15.1172  | 1.90827   | 27.9395  | 1.17511   | 27.805   | 0.69729   | 34.2878  | 1.56709   | 33.8908  | 3.83024   | 43.0975  | 2.34451   | 41.6387  | 3.145796958  | 6.331722217 | 0.00014181  | 0.021968524 |
| SAMD1L    | 25.6451   | 139.116  | 22.7668   | 242.949  | 21.2339   | 262.477  | 25.7703   | 332.118  | 13.1541   | 179.512  | 5.84297   | 167.208  | 18.7612   | 232.929  | 3.631677835  | 9.932861393 | 0.000146811 | 0.022376958 |
| TNFRSF9   | 0.52234   | 3.82366  | 0.55507   | 12.0927  | 0.429368  | 4.94852  | 0.44103   | 13.3844  | 0.511976  | 10.0865  | 0.504679  | 5.00797  | 0.598435  | 11.9894  | 4.316889002  | 5.352112224 | 0.000146811 | 0.022376958 |
| IRG1      | 0.0395275 | 12.9945  | 0.0854106 | 30.5297  | 0.0820767 | 52.2846  | 0.085255  | 101.314  | 0.0855588 | 73.1715  | 0.370105  | 126.826  | 0.154015  | 51.7641  | 8.326450565  | 5.790520493 | 0.000148357 | 0.022425588 |
| APOBEC3A  | 0.794366  | 74.4349  | 0.576361  | 198.417  | 0.48329   | 112.346  | 1.68233   | 291.374  | 1.16493   | 241.921  | 1.78959   | 436.442  | 0.903425  | 253.675  | 7.413862278  | 7.413862278 | 0.000152352 | 0.02283258  |
| GBP2      | 17.8652   | 117.435  | 15.1571   | 142.972  | 34.5362   | 248.397  | 25.0681   | 385.664  | 29.5215   | 241.1    | 22.0148   | 335.056  | 28.0816   | 263.152  | 3.226432941  | 8.610177661 | 0.000175048 | 0.026044685 |
| LYN       | 39.1683   | 148.937  | 36.3828   | 205.939  | 38.4329   | 187.281  | 34.6147   | 273.168  | 32.2424   | 186.914  | 29.2886   | 209.229  | 31.8911   | 188.402  | 5.559174694  | 8.923805286 | 0.000176807 | 0.026044685 |
| WNT5A     | 1.28404   | 6.22763  | 4.08497   | 16.06    |           |          |           |          |           |          |           |          |           |          |              |             |             |             |

PT.LPS.vs.PT.unstim

|            |           |          |            |          |           |          |           |          |           |          |           |           |           |             |              |              |             |             |            |
|------------|-----------|----------|------------|----------|-----------|----------|-----------|----------|-----------|----------|-----------|-----------|-----------|-------------|--------------|--------------|-------------|-------------|------------|
| SERP1G1    | 0.870351  | 72.1422  | 0.443194   | 51.3972  | 0.945684  | 18.2931  | 1.36332   | 75.6466  | 1.03744   | 54.151   | 1.22991   | 62.6594   | 0.938336  | 36.2233     | 5.287456617  | 5.100107506  | 0.000364646 | 0.043150571 |            |
| CCl8       | 0         | 32.727   | 0.185945   | 67.8265  | 0.349087  | 221.135  | 0.452237  | 169.32   | 0.62167   | 211.176  | 0.0847473 | 87.9884   | 0.930942  | 281.829     | 8.222040117  | 7.379306296  | 0.000368069 | 0.043286796 |            |
| SRP2       | 0.71137   | 68.1181  | 1.3341     | 58.7087  | 1.2872    | 42.241   | 1.453     | 78.345   | 0.897764  | 51.7901  | 9.71097   | 83.8874   | 2.34611   | 67.034      | 4.82170961   | 5.21823481   | 0.00037618  | 0.044252391 |            |
| XRN1       | 11.4337   | 64.0701  | 12.4346    | 106.249  | 18.3658   | 158.116  | 11.5467   | 151.596  | 7.24118   | 92.5769  | 1.62617   | 77.801    | 14.6474   | 160.119     | 3.355122581  | 6.288823658  | 0.000382225 | 0.044403387 |            |
| FAM186B    | 0.0952605 | 2.03656  | 0.168127   | 2.63032  | 0.017916  | 1.3983   | 0.050468  | 3.24184  | 0         | 1.70202  | 0.127309  | 2.63946   | 0.0177235 | 1.82649     | 6.348234931  | 1.521798123  | 0.000399204 | 0.046034763 |            |
| CCl15      | 0.0418282 | 67.0611  | 0.517919   | 21.8843  | 1.13336   | 172.212  | 0.254279  | 70.2574  | 0         | 22.6197  | 0.838998  | 173.996   | 0.582372  | 126.487     | 7.25735356   | 5.969706564  | 0.000409527 | 0.04700181  |            |
| RIPK2      | 8.60837   | 44.9557  | 10.9012    | 72.8568  | 13.2755   | 107.791  | 9.49547   | 84.5621  | 8.08516   | 65.2709  | 8.61497   | 88.371    | 14.1919   | 141.757     | 3.181263254  | 7.703208039  | 0.000413956 | 0.047252659 |            |
| DCP1A      | 11.3353   | 55.3514  | 13.3994    | 62.6466  | 12.339    | 52.608   | 10.464    | 70.9659  | 10.6527   | 65.5068  | 10.8113   | 67.0269   | 13.5156   | 75.912      | 2.481215168  | 8.182546234  | 0.000420359 | 0.04769115  |            |
| TRIM31     | 0         | 4.52614  | 0.0177936  | 3.18573  | 0.0855159 | 4.57342  | 0.0152425 | 1.187    | 0         | 8.27186  | 0         | 4.89496   | 0         | 4.3001      | 9.178079882  | 2.13797899   | 0.000438928 | 0.049491953 |            |
| PPP3CC     | 8.2109    | 30.1914  | 9.62465    | 37.3933  | 11.5118   | 45.3846  | 8.56973   | 52.9804  | 7.43023   | 38.1268  | 6.6455    | 51.7428   | 10.1386   | 64.2088     | 2.66274631   | 6.459504253  | 0.000445629 | 0.049495881 |            |
| MIR155HG   | 0.356034  | 7.77128  | 0.612761   | 50.39    | 0.943204  | 43.5801  | 0.481745  | 37.3399  | 1.1518    | 15.8857  | 0.347768  | 18.1117   | 1.49585   | 52.74       | 5.129416184  | 5.27488004   | 0.000444247 | 0.049495881 |            |
| TNFAIP2    | 22.3351   | 159.296  | 19.2873    | 208.673  | 12.5802   | 115.739  | 17.5459   | 199.582  | 30.7065   | 219.733  | 33.91     | 231.207   | 11.302    | 102.931     | 3.184680447  | 7.990795614  | 0.000461248 | 0.051091243 |            |
| LINC00158  | 0         | 0.666794 | 0          | 2.82393  | 0         | 4.64052  | 0         | 3.276    | 0         | 0.866115 | 0         | 2.78206   | 0.0382948 | 9.23399     | 7.561052517  | 2.728894933  | 0.000464005 | 0.05109952  |            |
| TAP2       | 9.51658   | 28.6412  | 12.4384    | 46.1936  | 8.2052    | 33.847   | 7.79299   | 37.1392  | 5.82132   | 37.3235  | 4.35748   | 29.0614   | 5.88459   | 39.8056     | 2.766758711  | 7.11459515   | 0.000469651 | 0.05145799  |            |
| BCL2L14    | 1.2925    | 24.1179  | 0.67415    | 16.4703  | 0.80171   | 22.6735  | 0.214695  | 52.3425  | 0         | 4.42123  | 0.366139  | 31.8529   | 0.115757  | 14.2078     | 6.860786747  | 3.778022253  | 0.000474251 | 0.051631009 |            |
| IFIT5      | 3.26961   | 33.2656  | 3.41476    | 53.6107  | 5.0067    | 55.1432  | 5.79838   | 52.8469  | 4.09231   | 47.1213  | 1.3117    | 48.8017   | 6.67404   | 63.9286     | 7.244504676  | 7.244504676  | 0.000485447 | 0.05254963  |            |
| CCXCL3     | 0         | 3.39065  | 0.0339389  | 6.29228  | 0         | 18.8234  | 0.145731  | 6.55506  | 0         | 17.3762  | 1.16251   | 15.3262   | 0.356788  | 60.0351     | 7.338978631  | 5.020451615  | 0.00049013  | 0.053111719 |            |
| CGN        | 0.022876  | 1.85805  | 0.106022   | 2.0503   | 0.0317264 | 1.24916  | 0.0623311 | 2.61156  | 0         | 1.02625  | 0.0712684 | 2.39561   | 0         | 0.937159    | 8.405404461  | 1.363572698  | 0.000502202 | 0.053452225 |            |
| FGD5       | 6.76752   | 2.26243  | 10.0115    | 1.81346  | 9.15993   | 6.75145  | 0.773146  | 1.95959  | 13.2978   | 1.33715  | 19.9569   | 13.2978   | 1.33715   | 9.37637     | 1.16715      | -3.005631666 | 5.074139998 | 0.000506789 | 0.05364078 |
| WTAP       | 14.6009   | 52.3729  | 18.3532    | 104.305  | 18.2643   | 115.05   | 15.3337   | 146.474  | 18.2527   | 120.487  | 10.8385   | 84.9996   | 19.4142   | 121.112     | 2.19629253   | 6.982707723  | 0.000516194 | 0.054334382 |            |
| TNIP1      | 47.5245   | 269.351  | 43.803     | 233.678  | 31.6654   | 157.132  | 33.6932   | 353.591  | 58.9716   | 397.917  | 100.554   | 506.964   | 29.4726   | 266.554     | 3.185374819  | 8.589055782  | 0.000533933 | 0.055882329 |            |
| HHEX       | 4.08618   | 0.793419 | 5.52714    | 0.212633 | 5.18438   | 0.491388 | 7.57912   | 0.856822 | 4.12783   | 0.132842 | 5.04049   | 0.569449  | 5.07672   | 0.155046    | -4.957801989 | 2.182909061  | 0.000542433 | 0.056472727 |            |
| IFI6       | 46.4375   | 767.347  | 19.0321    | 740.075  | 16.2727   | 834.712  | 99.1916   | 681.56   | 161.515   | 2265.56  | 30.8894   | 783.939   | 16.1501   | 602.966     | 5.222498757  | 7.786424519  | 0.000548386 | 0.056781766 |            |
| TRIM69     | 0.647026  | 1.81762  | 0.186036   | 3.49181  | 0.384322  | 1.76844  | 0.26203   | 3.16275  | 0.299762  | 3.44281  | 0.217358  | 2.27551   | 0.200407  | 4.33429     | 4.588941282  | 2.102655982  | 0.000554511 | 0.057105689 |            |
| TMOD2      | 0.885201  | 0.841522 | 0.596308   | 2.12627  | 0.349925  | 1.66457  | 0.26875   | 3.1702   | 0.237887  | 2.30751  | 0.112874  | 1.20821   | 0.206465  | 2.75142     | 3.896105754  | 3.896105754  | 0.000562017 | 0.057562402 |            |
| C10TNF1    | 0.0895004 | 0.797308 | 0.0129152  | 1.21005  | 0         | 0.740237 | 0.0442352 | 3.04403  | 0         | 2.4954   | 0         | 2.76388   | 0         | 1.86092     | 8.4279192789 | 1.437567448  | 0.000573    | 0.058375879 |            |
| TNFAIP3    | 11.3683   | 79.319   | 13.6709    | 110.076  | 9.35011   | 80.094   | 6.09508   | 139.038  | 11.7572   | 125.183  | 23.3361   | 178.878   | 15.3366   | 134.181     | 3.172178179  | 8.555977166  | 0.00059264  | 0.060058431 |            |
| PER3       | 12.2953   | 4.82119  | 11.5948    | 3.29249  | 13.8968   | 3.91764  | 11.9256   | 1.99337  | 9.17039   | 2.13493  | 10.3859   | 2.66494   | 14.0388   | 1.87296     | -2.906708857 | 5.743361023  | 0.000599662 | 0.060450512 |            |
| ZNF618     | 3.45802   | 16.0853  | 3.49056    | 16.0712  | 3.41002   | 10.3424  | 3.19219   | 16.2232  | 1.80452   | 8.1618   | 3.89611   | 15.2654   | 1.00244   | 6.68054     | 2.732248573  | 5.261568737  | 0.00061446  | 0.061632169 |            |
| AINOCE3F   | 1.34447   | 11.6227  | 1.10502    | 8.16292  | 0.892045  | 3.74395  | 1.43531   | 8.10608  | 0.470446  | 5.64517  | 0.889908  | 13.8563   | 0.260892  | 7.00919     | 4.062799926  | 3.55611476   | 0.000623471 | 0.062190423 |            |
| LINC000515 | 1.4455    | 31.4924  | 2.09188    | 87.5534  | 5.01083   | 83.6698  | 0.787803  | 122.53   | 0         | 49.1019  | 1.53398   | 77.7314   | 7.24539   | 283.16      | 5.286756234  | 5.352705338  | 0.000636574 | 0.063166698 |            |
| DOCK4      | 11.4313   | 56.5607  | 16.6093    | 63.8752  | 23.3084   | 94.1833  | 16.4801   | 95.835   | 19.4951   | 66.5119  | 21.143    | 90.3645   | 20.6495   | 101.478     | 2.294588422  | 9.120645223  | 0.000654281 | 0.064409643 |            |
| BLZF1      | 6.58129   | 34.7642  | 8.90077    | 51.9568  | 10.6608   | 48.55    | 8.55473   | 51.3546  | 6.09051   | 40.9102  | 3.75681   | 37.8587   | 9.24787   | 66.2825     | 2.838046146  | 6.484846454  | 0.000674582 | 0.066248112 |            |
| CCl4       | 19.9455   | 623.22   | 66.1666    | 953.55   | 63.3498   | 1166.07  | 19.0072   | 1143.52  | 82.2801   | 4620.2   | 40.5543   | 2292.14   | 60.1564   | 2178.25     | 5.180877814  | 9.195418824  | 0.000678522 | 0.066270957 |            |
| ADAR       | 37.2267   | 149.217  | 40.109     | 158.812  | 43.0428   | 126.528  | 41.2732   | 186.192  | 40.9532   | 169.007  | 39.8268   | 179.898   | 33.3386   | 163.175     | 2.287838387  | 9.449099595  | 0.000681771 | 0.066270957 |            |
| AKT1S1     | 2.12903   | 20.3241  | 2.82399    | 28.7475  | 1.39247   | 17.8845  | 2.1988    | 19.0378  | 2.48737   | 20.5001  | 2.80239   | 19.189    | 1.06809   | 8.95363     | 3.058978588  | 3.65393366   | 0.000691275 | 0.068853632 |            |
| AKT5C      | 0.160325  | 2.83367  | 0.00671033 | 12.2117  | 0         | 3.45012  | 0.029414  | 11.7977  | 0.0083921 | 2.47673  | 0.0185119 | 0.0302653 | 7.32604   | 5.317521949 | 2.7221949    | 0.000709392  | 0.067451038 | 0.000709392 |            |
| TBC1D14    | 13.3712   | 7.03128  | 13.7454    | 4.2484   | 11.2074   | 3.05455  | 13.8421   | 2.55389  | 10.3179   | 3.6098   | 13.0672   | 2.78984   | 12.2665   | 1.97304     | -2.66686203  | 6.213994397  | 0.000723313 | 0.068248999 |            |
| TOR1B      | 10.4111   | 68.304   | 14.1422    | 89.1997  | 11.2678   | 73.1313  | 12.6138   | 65.2237  | 10.054    | 49.1528  | 12.8272   | 102.744   | 15.2472   | 96.5758     | 2.661117914  | 7.330439268  | 0.000730641 | 0.068600852 |            |
| SLC25A28   | 8.33332   | 57.3025  | 6.64877    | 37.3558  | 5.08637   | 41.5367  | 7.12112   | 71.4165  | 13.6236   | 87.1534  | 9.63453   | 86.2305   | 8.11352   | 68.6306     | 5.86257904   | 0.000735952  | 0.000735952 | 0.06872952  |            |
| TNC        | 0.386516  | 14.404   | 0.320892   | 25.8499  | 0.554811  | 36.7574  | 0.11236   | 26.3419  | 1.67787   | 54.0624  | 0.290522  | 24.2471   | 0.999729  | 78.0311     | 6.281746571  | 8.538445471  | 0.000748396 | 0.070586382 |            |
| DNAAF1     | 0.0335946 | 1.81259  | 0.0436063  | 2.04433  | 0.0465201 | 13.1699  | 0.0746707 | 10.3974  | 0         | 12.9878  | 0.392968  | 30.9828   | 0.065398  | 17.65       | 7.94357599   | 4.471869452  | 0.000761464 | 0.07182337  |            |
| SOCS3      | 3.77529   | 38.7117  | 3.91146    | 58.8047  | 2.25613   | 38.321   | 1.92102   | 54.1974  | 6.40484   | 234.304  | 6.61435   | 105.665   | 3.48862   | 62.1087     | 4.150414228  | 6.541014361  | 0.000775076 | 0.072385981 |            |
| GJB2       | 2.09501   | 35.6979  | 3.32035    | 81.1491  | 2.82794   | 49.8821  | 1.7998    | 59.1304  | 5.572057  | 57.6069  | 8.89852   | 47.9203   | 2.47201   | 43.6986     | 4.1389664    | 5.786557461  | 0.000782547 | 0.072435433 |            |
| GCNT4      | 0.0578716 | 2.3146   | 0.240968   | 5.64794  | 0.497318  | 9.87191  | 0.111676  | 8.84606  | 0.175899  | 4.92141  | 0.0135301 | 5.62839   | 0.301826  | 13.056      | 5.413610293  | 4.59774134   | 0.000785952 | 0.072435433 |            |
| TNFSF15    | 0.217003  | 22.3233  | 0.370384   | 36.0163  | 0.267586  | 55.9863  | 0.27806   | 24.303   | 0.438237  | 29.3799  | 1.51234   | 96.3177   | 2.09656   | 163.392     | 6.298256126  | 9.22040762   | 0.000790514 | 0.072435433 |            |
| APOL1      | 6.1135    | 58.643   | 5.66571    | 43.4819  | 4.56135   | 27.0995  | 5.25031   | 55.6157  | 6.86283   | 65.7379  | 5.35575   | 41.2906   | 4.45635   | 33.2179     | 2.882386655  | 5.795736899  | 0.000791644 | 0.072435433 |            |
| NBN        | 12.3241   | 56.1189  | 14.181     | 84.5786  | 25.066    | 197.585  | 11.6128   | 129.075  | 7.81362   | 84.119   | 9.04313   | 100.028   | 24.1999   | 227.919     | 3.233609628  | 9.286629998  | 0.000819615 | 0.072435433 |            |
| MYZAP      | 1.89688   | 0.036546 | 3.17799    | 0.752862 | 1.60916   | 0.26339  | 1.88646   | 0.394265 | 3.35068   | 0        | 0.85966   | 0         | 2.11157   | 0           | -8.42145425  | 1.379528669  | 0.000799067 | 0.072494422 |            |
| B4GALT5    | 12.139    | 51.5015  | 14.3336    | 85.2236  | 13.8678   | 73.7047  | 9.7961    | 93.4071  | 15.9037   | 138.034  | 10.1446   | 107.282   | 15.7447   | 103.298     | 8.23826577   | 8.23826577   | 0.000821282 | 0.0741567   |            |
| OPTN       | 21.1708   | 133.692  | 17.3052    | 134.621  | 24.5518   | 227.393  | 8.80478   | 209.077  | 39.0362   | 399.555  |           |           |           |             |              |              |             |             |            |
